# Supplementary material for: Hierarchical rattle-like N-doped anatase TiO2 superstructure: one-pot synthesis, morphological evolution and superior visible light photocatalytic activity
Source: Royal Society of Chemistry journal article supplement (doi:10.1039/c5cy01820j), 2015-11-26
Supplement: c5cy01820j1.pdf [file c5cy01820j1.pdf]

## Supplementary information for:

### Hierarchical rattle-like N-doped anatase TiO<sub>2</sub> superstructure: one-pot synthesis, morphological evolution and superior visible light photocatalytic activity

Guoliang Li,\* Gang Li, Jie Li, and Guibin Jiang

State Key Laboratory of Environmental Chemistry and Eco-toxicology, Research Center for Eco-Environmental Sciences, Chinese Academy of Sciences. Beijing 100085, P.R. China.

#### Defination of the Kubelka-Munk function:

The diffuse reflection spectroscopy measurement can be converted into the equivalent absorption coefficient by applying the transformation based on the Kubelka-Munk function, which was defined as:

$$F(R_{\infty}) = \frac{K(\lambda)}{S(\lambda)} = \frac{(1 - R_{\infty})^2}{2R_{\infty}}$$

Where K, and S are the absorption and scattering coefficients, respectively. R is the reflectance. The optical band gaps of the semiconductors were evaluated based on the following expression<sup>1-2</sup>:

$$(\alpha h\nu)^{1/n} = B(h\nu - E_{bg})$$

Where  $\alpha$  is the absorption coefficient,  $h\nu$  is the incident photon energy,  $E_{bg}$  is the band gap energy, and B is a constant related to the effective masses of charge carriers associated with valance and conduction bands. The value of n depends on the type of interband transition: n = 2 for a direct transition, while n = 1/2 for an indirect transition. The adsorption coefficient is plotted against  $(h\nu - E_{bg})$ .

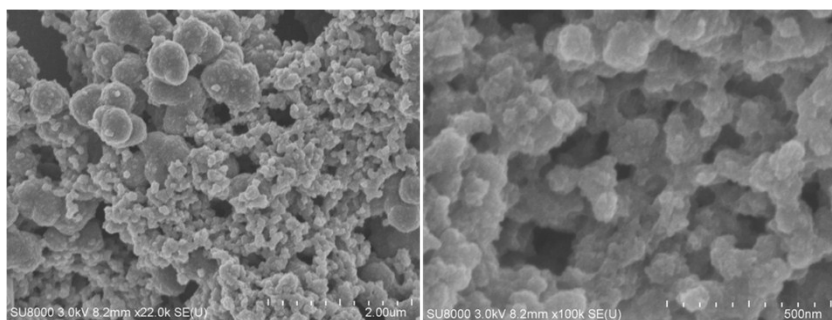

Fig. S1 SEM images of the primary products under ultrasonication treatment.

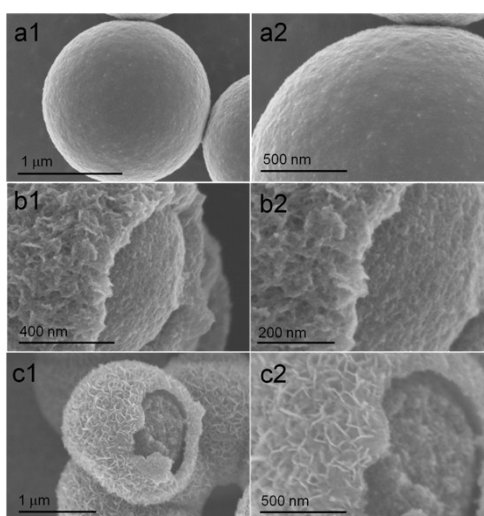

Fig. S2 HRSEM images of the samples prepared for different solvothermal reaction time. Note: a, b, and c are typical HRSEM images for samples obtained at 6 (NDRT<sub>6</sub>), 12 (NDRT<sub>12</sub>), and 24 (NDRT<sub>24</sub>) hours, respectively.

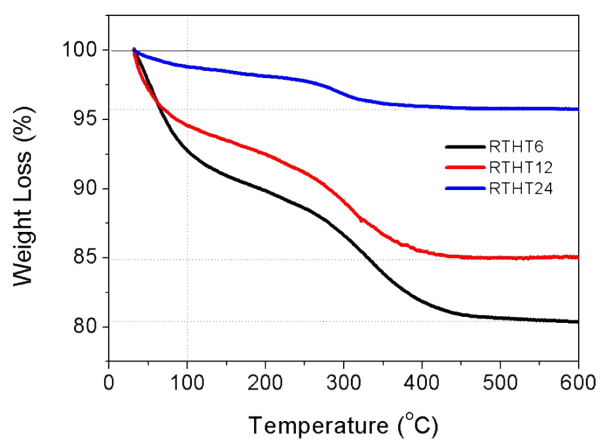

Fig. S3 TG curves for NDRT<sub>6</sub>, NDRT<sub>12</sub>, and NDRT<sub>24</sub>.

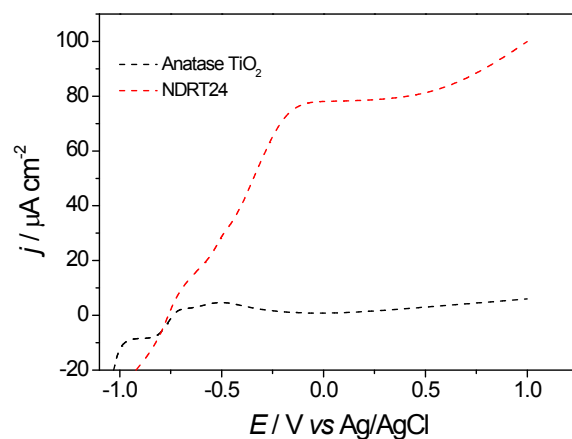

Fig. S4 Voltammograms of the as-prepared NDRT<sub>24</sub> and the comparison anatase TiO<sub>2</sub> under visible light ( $\lambda > 420$  nm) illumination.

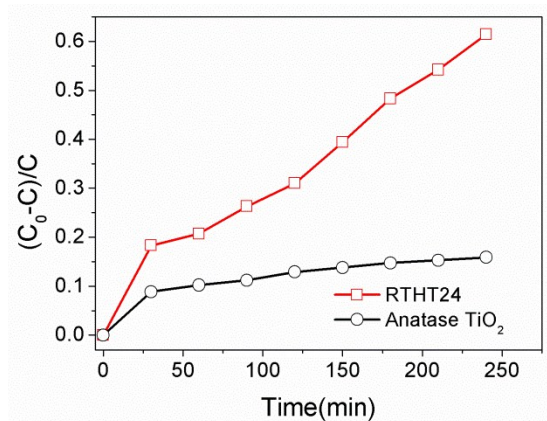

Fig. S5 Removal efficiency of formic acid by the prepared RTHT<sub>24</sub> and the commercial anatase TiO<sub>2</sub> under visible light irradiation.

Reference:

- 1 A. Petala, D. Tsikritzis, M. Kollia, S. Ladas, S. Kennou and D. I. Kondarides, *Appl. Surf. Sci.* 2014, **305**, 281.
- 2 H. Kisch, *Angew. Chem.- Int. Edit.* 2013, **52**, 812.
